# Supplementary material
Source: Springer Nature journal article supplement (https://www.springermedizin.de/resource/supplementary/12958_2010_745_MOESM1_ESM.pdf/9568392)

**A** LPS induced IL-6 increase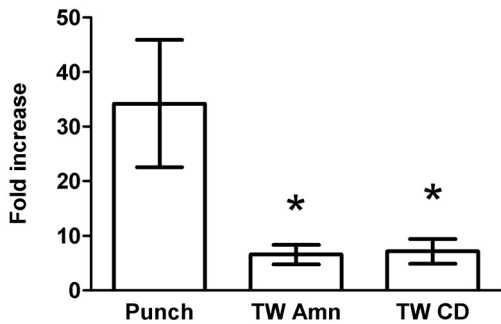**B** LPS induced IL-8 increase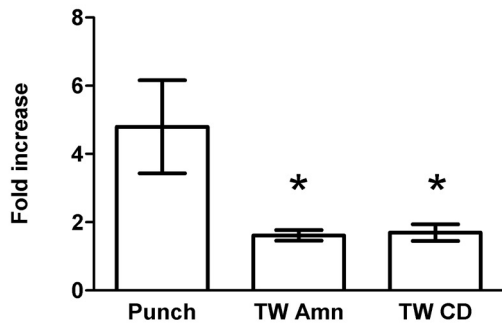**C** LPS induced IL-10 increase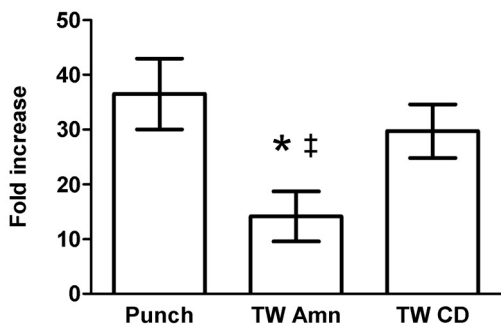**D** LPS induced IL-1 $\beta$  increase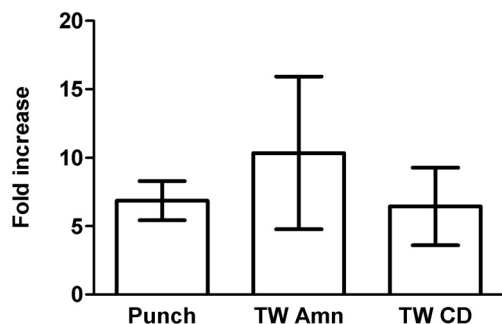**E** LPS induced TNF- $\alpha$  increase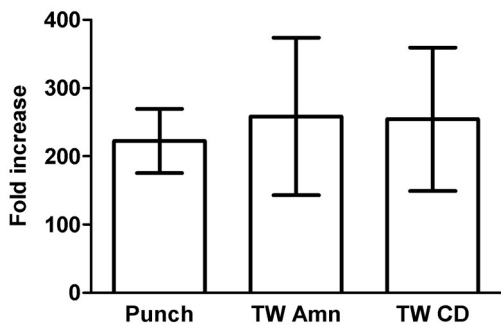

Supplement: MOESM1 [file 9568392]
